1     **Functional effects of haemoglobin can be rescued by haptoglobin**  
2     **in an *in vitro* model of subarachnoid haemorrhage.**

3

4     Hannah Warming<sup>1</sup>, Katrin Deinhardt<sup>1</sup>, Patrick Garland<sup>4</sup>, John More<sup>4</sup>, Diederik Bulters<sup>2\*</sup>, Ian  
5     Galea<sup>3\*</sup>, Mariana Vargas-Caballero<sup>1\*</sup>.

6

7     1 School of Biological Sciences, Faculty of Environmental and Life Sciences, University of Southampton,  
8     Southampton, SO17 1BJ, UK

9     2 Department of Neurosurgery, Wessex Neurological Centre, University Hospital Southampton NHS  
10     Foundation Trust, Southampton, SO16 6YD, UK

11     3 Clinical Neurosciences, Clinical and Experimental Sciences, Faculty of Medicine, University of Southampton,  
12     SO16 6YD, UK

13     4 Bio Products Laboratory Limited, Elstree, WD6 3BX, UK

14

15     \*corresponding authors and joint senior authors:

16     Mariana Vargas-Caballero School of Biological Sciences, Faculty of Environmental and Life Sciences, University  
17     of Southampton, Southampton, SO17 1BJ, UK.

18     e-mail: [m.vargas-caballero@soton.ac.uk](mailto:m.vargas-caballero@soton.ac.uk)

19     Ian Galea, Clinical Neurosciences, Clinical and Experimental Sciences, Faculty of Medicine, University of  
20     Southampton, SO16 6YD, UK

21     e-mail: [i.galea@soton.ac.uk](mailto:i.galea@soton.ac.uk)

22     Diederik Bulters, Department of Neurosurgery, Wessex Neurological Centre, University Hospital Southampton  
23     NHS Foundation Trust, Southampton, SO16 6YD, UK

24     [dbulters@nhs.net](mailto:dbulters@nhs.net)

25

26     **Abstract**

27     During subarachnoid haemorrhage, a blood clot forms in the subarachnoid space releasing

28     extracellular haemoglobin (Hb), which causes oxidative damage and cell death in

29     surrounding tissues. High rates of disability and cognitive decline in SAH survivors is

30     attributed to loss of neurons and functional connections during secondary brain injury.

31     Haptoglobin sequesters Hb for clearance, but this scavenging system is overwhelmed after a

32 haemorrhage. Whilst exogenous haptoglobin application can attenuate cytotoxicity of Hb *in*  
33 *vitro* and *in vivo*, the functional effects of sub-lethal Hb concentrations on surviving neurons  
34 and whether cellular function can be protected with haptoglobin treatment remain unclear.  
35 Here we use cultured neurons to investigate neuronal health and function across a range of  
36 Hb concentrations to establish the thresholds for cellular damage and investigate synaptic  
37 function. Hb impairs ATP concentrations and cytoskeletal structure. At clinically relevant but  
38 sublethal Hb concentrations, synaptic AMPAR-driven currents are reduced, accompanied by  
39 a reduction in GluA1 subunit expression. Haptoglobin co-application can prevent these  
40 deficits by scavenging free Hb to reduce it to sub-threshold concentrations and does not  
41 need to be present at stoichiometric amounts to achieve efficacy. Haptoglobin itself does  
42 not impair measures of neuronal health and function at any concentration tested. Our data  
43 highlight a role for Hb in modifying synaptic function after SAH, which may link to impaired  
44 cognition or plasticity, and support the development of haptoglobin as a therapy for  
45 subarachnoid haemorrhage.

46  
47  
48

#### 49 Keywords

50 Subarachnoid haemorrhage, SAH, Haemoglobin, Haptoglobin, Synaptic function.

51

#### 52 Introduction

53 Subarachnoid haemorrhage (SAH) causes irreversible damage to brain tissues both during  
54 the acute phase and in secondary brain injury (SBI), leading to a high fatality rate of 30-40%

55 [1,2] and significant disability in many survivors [3,4]. Raised intracranial pressure, oedema,  
56 inflammation and vasospasm lead to acute and delayed ischaemic damage, and are targeted  
57 by limited treatment options [4–7]. At the site of the haematoma, red blood cells (RBCs)  
58 begin to lyse within a few days, releasing their contents and leading to the accumulation of  
59 cell-free haemoglobin (Hb) in the cerebrospinal fluid (CSF). The Hb tetramer degrades into  
60 Hb dimers, hemichromes and eventually haem and free iron. Iron-containing products  
61 permeate into tissues, exposing neurons and other cells to oxidative stress [8]. Hb  
62 breakdown products such as met-Hb and haem can also directly activate inflammatory  
63 pathways, exacerbating damage and further contributing to SBI [9,10]. Hb and iron toxicity  
64 significantly contribute towards development of vasospasm and SBI [11–13], but are not  
65 currently clinically targeted.

66

67 It is well known that cell-free Hb leads to neuronal cell death *in vitro* [14–16] and *in vivo*  
68 [17,18] with key mediators being oxidative stress and ferroptosis caused by redox-active  
69 haem and iron, released from Hb [19,20]. More recently, research has suggested functional  
70 changes to neurons after exposure to Hb, such as reductions in synaptic anchoring proteins,  
71 neuroligins and neuroligins [21] leading to reduced formation of excitatory synapses. The  
72 pre-synaptic marker synaptophysin and post-synaptic protein PSD-95 were downregulated  
73 in a mouse model of prolonged Hb exposure in ventricular and subarachnoid spaces [22]. In  
74 two rat blood injection models of SAH these biochemical changes were accompanied by  
75 cognitive deficits, indicating neurotransmission may be altered [23]. Further evidence shows  
76 that long-term potentiation (LTP), the synapse-strengthening process thought to underlie  
77 learning and memory [24], was impaired in a rat pre-chiasmatic injection model of SAH [25].  
78 Hb-mediated impairments in synaptic plasticity as suggested by rodent studies may help

79 explain poor rates of recovery seen in SAH, in addition to cognitive changes that affect  
80 quality of life in survivors [26,27]. Despite strong evidence linking Hb accumulation and iron  
81 deposition in the brain to neurodegeneration, both in SAH and a number of other  
82 neurodegenerative diseases [28–31], functional data on neuronal activity in the presence of  
83 Hb is limited.

84

85 Free Hb measured in the CSF after SAH is highly variable and peaks on average around 10  
86  $\mu\text{M}$  [13,22]. This peak typically occurs between day 10-12 after the onset thus presenting a  
87 wide therapeutic window for clinical intervention targeting Hb neurotoxicity. Haptoglobin  
88 (Hp) functions as an effective Hb scavenger by binding irreversibly to Hb and preventing  
89 haem release. Hp is typically present in blood plasma within the range of 0.3-3mg/ml [32–  
90 34]. However, the large multimeric Hp proteins do not easily cross the blood-brain barrier  
91 and hence the concentration of Hp is much lower in the central nervous system compared  
92 to the systemic circulation [34], and Hp is rapidly depleted in the cerebrospinal fluid (CSF)  
93 after SAH [13]. Enhancing the CSF concentration of Hp *in vivo* can protect against cell loss,  
94 synaptic marker alteration, associated behavioural deficits [22] and vasospasm [12,22,35].  
95 Furthermore, Hp administration has been used in clinical trials to prevent Hb-mediated  
96 kidney damage in sickle-cell anaemia and blood transfusion without significant adverse  
97 effects [36,37], indicating good peripheral tolerance.

98

99 Here we build on this knowledge by investigating the functional effects of persistent Hb  
100 exposure in neurons, measuring neuronal health and synaptic activity to understand the  
101 effects of clinically relevant Hb concentrations in the brain and how this may impact  
102 secondary brain injury after SAH. CSF analyses show that neurons experience extended

103 exposure to 10  $\mu$ M or more free Hb after SAH [13,22] and the composition of Hb species  
104 changes within the first days and weeks after SAH due to the conversion of Hb to met-Hb,  
105 further degradation, and dissociation into haem and free iron. This can be measured *in vivo*  
106 based on the paramagnetic properties of oxy-Hb, deoxy-Hb and met-Hb using magnetic  
107 resonance imaging (MRI), such that the composition of the blood clot appears distinctly  
108 different at SAH onset and in the days and weeks that follow [38,39]. Research has shown a  
109 delay in the onset of Hb-mediated cell death in neuronal culture, with cell loss starting 8  
110 hours after application [14] suggesting that breakdown of Hb is likely implicated in its  
111 pathogenic effects. Whilst the exact timeline of Hb catabolism is uncertain in the brain  
112 environment, we chose to measure function of cells *vitro* after 48 hours and one week of Hb  
113 application, based on key changes to Hb composition assessed by neuroimaging.

114

115 We also studied the potential of Hp to prevent Hb-induced deficits, while considering the  
116 practical difficulties of the therapeutic agent reaching the location of haematoma and  
117 interstitial free Hb in a clinical setting. For example, is not likely possible to fully perfuse all  
118 CSF spaces with Hp after SAH, due to density of the haematoma in some places interfering  
119 with CSF flow [40]. High variability of free Hb concentration seen in patients after SAH will  
120 also be affected by the bleed volume, location and other factors [13], so accurately  
121 predicting Hb content and scavenging all free Hb is difficult. Additionally, not all free Hb is  
122 able to be bound by Hp *in vivo*: whilst the majority of Hb can be scavenged by Hp, there is a  
123 fraction of Hb that cannot be bound due to structural changes related to degradation or  
124 oxidative stress [22]. Hb permeates the outer cortex, as evidenced by an inward diminishing  
125 gradient of iron deposition after SAH [41], and it may be hard for a therapeutic agent  
126 delivered in the CSF space to reach the outer cortex in areas with closely apposed blood

127 clot. Finally, the CSF is a purposely low protein fluid [42] and high CSF protein content is  
128 associated with poor outcome after SAH [43], which limits the amount of protein which can  
129 be administered intrathecally. For all these reasons, we investigated a partial, rather than  
130 stoichiometric, scavenging of free Hb by Hp, to understand the threshold of free Hb that is  
131 tolerated by neurons. Ultimately this will improve understanding of the effects of Hb on  
132 neuronal function and add to the body of knowledge needed to develop Hp as a clinical  
133 therapeutic in SAH.

134

## 135 **Materials and Methods**

### 136 **Haemolysate preparation**

137 Human blood was obtained from human volunteers after informed consent (National  
138 Research Ethics Service approval 11/SC/0204 and institutional research ethics approval  
139 ERGO 41084.A1). Whole blood was collected in heparin tubes (BD, UK) and transferred to a  
140 centrifuge tube onto a layer of histopaque-1077 (Sigma-Aldrich, roughly 30% of final  
141 volume). The tube was centrifuged at 900G for 15 minutes and top layers removed, leaving  
142 the lower fraction containing red blood cells (RBCs). RBCs were washed with sterile  
143 Dulbecco's phosphate buffered saline to remove other cells and plasma until supernatant  
144 was clear and colourless, before lysing with sterile distilled water. Following centrifugation  
145 at 13,000rpm for 30 minutes to remove ghost membranes, supernatant was removed,  
146 passed through a 15 µm filter and analysed with a bicinchoninic acid assay (Pierce™ □) to  
147 determine protein concentration before storage at -80°C. Spectrophotometry was carried  
148 out on each batch before use to determine the haemoglobin species composition,  
149 comprising on average  $79.8 \pm 1.4\%$  oxyhaemoglobin,  $13.2 \pm 1.3\%$  deoxyhaemoglobin and 7.0

150  $\pm 2.0\%$  methaemoglobin [44]. Haemolysate (HL) concentration is expressed throughout as a  
151 concentration of dimers, hence  $10\ \mu\text{M}$  HL is equivalent to  $20\ \mu\text{M}$  of iron-containing haem.

152

### 153 **Source of haptoglobin and scavenging analyses**

154 Hp was prepared by Bio Products Laboratory Ltd from pooled human blood plasma,  
155 enriched for Hp1 dimer. Hp was dialysed with a molecular cut off of 14 kDa and endotoxin  
156 content was measured at  $<0.02\ \text{E.U./ml}$ . Hp molar concentration refers to a weighted  
157 average molecular weight of monomers, in the purified mixture of Hp1 and Hp2.

158 To determine rate of free Hb scavenging, a fixed amount of HL was incubated with  
159 increasing amounts of Hp for 16 hours at room temperature, and  $2\ \mu\text{g}$  of Hb from each mix  
160 separated on a non-denaturing 8% polyacrylamide gel. Hb band density was analysed  
161 against a HL-only control lane within each gel to quantify the percentage of unbound Hb for  
162 each incubation ratio. A binding curve from three gel repeats was used to estimate the  
163 concentration of free Hb in treatment groups with co-application of Hp throughout  
164 experiments.

165

### 166 **Primary neuron cultures**

167 C57/BL6 mice of either sex (Charles River, bred in-house under a 12/12 hr light/dark cycle at  
168  $21^\circ\text{C}$ ) were culled on the day of birth (P0) and brains dissected in Dulbecco's PBS without  
169 calcium or magnesium (Gibco). Hippocampi were isolated and dissociated with papain  
170 before seeding onto poly-D-lysine coated glass coverslips at  $1,000\ \text{cells/mm}^2$ . Cells were  
171 incubated with Neurobasal Medium (Gibco) supplemented with 1% Glutamax-I and 2% B27,  
172 incubated at  $37^\circ\text{C}$  with 5%  $\text{CO}_2$ . A full media change was carried out at DIV7 and HL and/or  
173 Hp applied after randomised allocation to culture wells alongside a media volume top-up at

174 DIV14. Treatment groups were blinded until raw data analysis was complete for each  
175 experiment.

176

### 177 **ATP Assay**

178 Primary cultures were washed once with supplemented Neurobasal Medium and then fresh  
179 medium applied, with an equal volume of reaction mixture from the CellTitre Glo assay kit  
180 (Promega) at room temperature to measure adenosine triphosphate (ATP) levels. The kit  
181 was used as per manufacturer instructions: plates were mixed using an orbital shaker for 2  
182 minutes, incubated for a further 8 minutes before 200 µl of mixture was pipetted in  
183 triplicates into 96-well plates for measurement of luminescence, using a Promega Glo-  
184 Max®-Multi Microplate reader. Background luminescence was measured and subtracted  
185 from readings using a control of culture medium without cells, and results were unblinded  
186 and normalised to vehicle-treated cells within cultures.

187

### 188 **Immunofluorescent staining and microscopy**

189 Neuron cultures were fixed at DIV21 with 4% paraformaldehyde, permeabilised with 0.1%  
190 Triton-X100 and washed in tris-buffered saline. Cells were blocked using goat serum and  
191 stained with anti-tubulin 1:400 (Cell Signalling 2128) followed by Alexa Fluor secondary  
192 antibodies at 1:1000 in 2% goat serum. Coverslips were mounted onto microscope slides  
193 using mounting medium containing 4',6-diamidino-2-phenylindole (DAPI) (Fluoroshield  
194 ab104139, Abcam) and imaged using an Olympus IX83 inverted microscope with a 40X air  
195 objective, Intensilight CHGFI metal halide light source (Nikon) and Optimos sCMOS camera  
196 (photometrics, USA). Images were acquired using Cellsens software and processed by  
197 background subtraction using a radius of 50 pixels and overlaid using FIJI software [45].



198 Treatment groups were blinded from the point of treatment application until image  
199 processing was completed, and fields of view were chosen using DAPI channel.

200

## 201 **Patch clamp electrophysiology**

202 Cells were used for patch clamp electrophysiology at DIV21  $\pm$  1. Recordings were low-pass  
203 filtered at 5 kHz using an Axopatch 200B amplifier and acquired at 20 kHz using a National  
204 Instruments board analog to digital converter. Matlab software (Mathworks, Natick, U.S.A.),  
205 custom software (Ginj2.0, Hugh P.C. Robinson) and WinEDR software (Strathclyde) were  
206 used for data acquisition. Borosilicate glass micropipettes were pulled to a resistance of 5-7  
207 M $\Omega$  and filled with intracellular solution containing, in mM, 125 potassium gluconate, 10  
208 KCl, 10 HEPES, 10 Phosphocreatine, 0.4 GTP, 4 Mg-ATP and pH balanced to 7.3 using KOH.  
209 Recordings were made in artificial CSF containing, in mM, 126 sodium chloride, 2 calcium  
210 dichloride, 10 glucose, 2 MgSO<sub>4</sub>, 3 potassium chloride and 26.4 sodium carbonate. The liquid  
211 junction potential of -12.5 mV was not corrected for. Artificial CSF was bubbled with 95%  
212 oxygen, 5% CO<sub>2</sub> throughout and maintained at 25  $\pm$  1°C.

213 Passive membrane properties were measured using voltage-clamp, and cells excluded if the  
214 input resistance exceeded 1 G $\Omega$  indicating non-pyramidal cells [46–48], or if series  
215 resistance exceeded 30 M $\Omega$ . The first 3 recorded cells to meet these criteria in each repeat  
216 were included for further analysis. Active membrane properties were measured using a  
217 current-step injection stimulus in bridge-compensated current clamp (see Figure 3), and  
218 current injection to maintain cells at -70 mV. Evoked EPSPs were recorded from connected  
219 pairs of cells. A positive current injection of 500-1000 pA with duration 6 msec was applied  
220 to induce a single action potential and measure a postsynaptic response repeated at 0.14  
221 Hz. Evoked excitatory postsynaptic potentials (EPSCs) were recorded in the same manner,

222 with the postsynaptic cell in bridge mode. Paired-pulse ratio was measured from EPSCs with  
223 a 50 msec interval between presynaptic stimulations. Miniature EPSCs (mEPSCs) were  
224 recorded at -70 mV using a Cs-gluconate based intracellular solution containing, in mM,  
225 gluconic acid 70, caesium chloride 10, sodium chloride 5, BAPTA 10, HEPES 10, QX-314 10,  
226 GTP-NaCl 0.3, ATP-Mg 4 and adjusted to pH 7.3 using 1M CsOH. Artificial CSF contained 500  
227 nM tetrodotoxin and 1  $\mu$ M SR-95531. The liquid junction potential for Cs-gluconate solution  
228 of -12 mV was not corrected for.

229

### 230 **Polyacrylamide gel electrophoresis**

231 Protein lysates were collected at DIV21 for Western blotting and separated in 7% sodium  
232 dodecyl sulfate polyacrylamide gels using electrophoresis. Proteins were transferred to  
233 nitrocellulose membranes and stained using anti-GluA1 antibody (13185, Cell Signalling)  
234 secondary antibody & imaged using an infrared scanner (Odyssey®, LI-COR Biosciences). Blot  
235 quantification was carried out using ImageStudio software (LI-COR). For Hb-Hp binding  
236 experiments, a fixed amount of Hb was incubated with varying Hp at room temperature  
237 overnight and the resulting mixtures separated using non-denaturing 8% polyacrylamide gel  
238 electrophoresis before staining with Coomassie, loading 2  $\mu$ g of Hb per lane. Gels were de-  
239 stained in 10% methanol with 7% glacial acetic acid overnight, imaged and quantified  
240 against a control lane containing 2  $\mu$ g of unbound Hb within each gel.

241

### 242 **Data analysis**

243 mEPSC recordings were analysed with Eventer software (A. Penn, University of Sussex [49])  
244 with a low-pass filter of 1000 Hz. A machine-learning model was trained using  
245 approximately 2500 mEPSC events across all treatment conditions, detected using the

246 Pearson method with a threshold of 4 standard deviations of the noise. Training took place  
247 by manually accepting or rejecting events based on appropriate rise and decay kinetics. The  
248 model was then employed to detect events automatically in each mEPSC recording and  
249 report the inter-event interval and peak amplitude of the first 500 events per cell. Intrinsic  
250 membrane properties and evoked EPSP and EPSC amplitude were analysed from raw data  
251 using custom-written Matlab code. Evoked currents and potentials were averaged from 50-  
252 100 repeats per cell, 3 cells per independent neuron culture with automatic event onset  
253 detection. Paired-pulse ratio was measured as the ratio between median average values for  
254 each EPSC from 50-100 repeats per cell. All statistical analyses were performed in GraphPad  
255 Prism V9 (GraphPad Software, CA, USA) using a two-way repeated measures ANOVA with  
256 matching within cultures and Dunnett's post-hoc corrections. We did not assume data  
257 sphericity in experiments where data was normalised within each culture, and epsilon ( $\epsilon$ ) is  
258 reported when the Geisser-Greenhouse correction has been applied in these analyses. Data  
259 are represented as mean  $\pm$  SEM.

260

## 261 **Results**

### 262 **Haemolysate disrupts ATP levels and neurite structure *in vitro***

263 To firstly characterise the threshold for neuronal damage by Hb in our neuronal culture  
264 system we applied increasing concentrations of HL prepared from human RBCs to  
265 hippocampal neuronal cultures at DIV14 and we measured ATP concentration in the lysed  
266 cell population using the luciferase-based CellTitre Glo assay. HL application started at 10  
267  $\mu$ M of Hb dimer as measured in human CSF after SAH [22], and was applied up to 200  $\mu$ M.  
268 We observed a dose-dependent reduction in ATP starting at 50  $\mu$ M HL at 48 hours

269 (F(2.4,23.6)=520.8,  $\eta^2 = 0.48$ ,  $p < 0.0001$ , Figure 1A), and starting at 20  $\mu\text{M}$  after one week of  
270 HL application (F(2.5,29.9)=713.6,  $\eta^2 = 0.5$ ,  $p < 0.0001$ , Figure 1B). To assess neurite structure,  
271 we imaged neurons using immunofluorescent staining of  $\beta$ -tubulin and DAPI. At all  
272 concentrations of HL used, neurite beading indicative of microtubule structure disruption  
273 was observed after a one week incubation, which worsened with increasing concentration  
274 of HL (Figure 1C).

275

### 276 **Haemolysate neurotoxicity can be prevented with haptoglobin**

277 To determine if Hp can prevent HL-induced toxicity, we co-applied Hp with HL to cells for  
278 one week and repeated ATP measurements. Hp alone at 30  $\mu\text{M}$  appeared to show an  
279 increase in ATP (F(2.58,25.8)=40.4,  $\eta^2 = 0.51$ ,  $p < 0.0001$ , Figure 2A) but all other  
280 concentrations up to 120  $\mu\text{M}$  were not different compared to vehicle conditions indicating  
281 that Hp does not reduce ATP levels in neuronal cell cultures even at very high  
282 concentrations.

283

284 Next, we investigated whether partial scavenging was sufficient to protect from  
285 neurotoxicity by binding one-third of free Hb with exogenously co-applied Hp. We measured  
286 ATP levels after co-applying Hp with HL for one week, and found that scavenging  $34 \pm 3.6\%$   
287 of free Hb, reducing free Hb from 20 to  $13.2 \pm 0.7 \mu\text{M}$ , was sufficient to prevent an ATP  
288 deficit (F(1.2, 9.7)=12.4,  $\eta^2 = 0.61$ ,  $p = 0.004$ , Figure 2B). We further investigated 50  $\mu\text{M}$  HL  
289 with increasing Hp concentrations, and found that the ATP deficit was not prevented by  
290 scavenging one-third of free Hb, but could only be prevented when the majority of free Hb  
291 was bound by Hp (F(2.2,43.8)=124.9,  $\eta^2 = 0.44$ ,  $p < 0.0001$ , Figure 2C). These data suggest  
292 that Hp can prevent ATP deficits in neuron cultures at high concentrations of Hb, by

293 scavenging free Hb to sub-lethal levels. The threshold for a Hb-induced ATP deficit appeared  
294 to lie between 13.2-20  $\mu\text{M}$  free Hb. Staining of  $\beta$ -tubulin in the same neuronal cultures after  
295 incubation with 50  $\mu\text{M}$  HL and co-application of Hp showed neurite beading in all conditions  
296 with free Hb, and microtubules were restored to vehicle morphology under conditions of  
297 full Hb scavenging (Figure 2D).

298

### 299 **Sublethal haemolysate does not alter intrinsic membrane properties of neurons**

300 Previous data had shown that free Hb perturbs the resting membrane potential of neurons  
301 [50] and these effects may be driven by changes in neuronal excitability or ongoing synaptic  
302 activity. To investigate the functional effects of HL on the excitability of neuronal cultures  
303 we measured intrinsic membrane properties of neurons at DIV21  $\pm$ 1 in whole-cell patch  
304 clamp electrophysiology, after a one week exposure to HL or Hp in culture medium. 10  $\mu\text{M}$   
305 Hb, which has been measured as the average peak in human CSF after SAH [22] does not  
306 appear to cause an ATP deficit and was therefore used as a clinically relevant yet sublethal  
307 HL insult for electrophysiological studies. As such we could use visualised patch clamp to  
308 record from neurons randomly selected from a large population. Since scavenging one-third  
309 of free Hb restored ATP deficits using 20  $\mu\text{M}$  HL, we employed the same scavenging ratio  
310 when co-applying Hp to 20  $\mu\text{M}$  HL for electrophysiology, reducing the free Hb concentration  
311 in culture medium from 10  $\mu\text{M}$  to approximately  $6.4 \pm 0.4 \mu\text{M}$ .

312

313 We found no effect of treatment on the resting membrane potential of neurons ( $F(3,$   
314  $54)=0.2451, p=0.86$ ) or input resistance ( $F(3, 54)=1.34, p=0.27$  (Figure 3A-B). Next, we used  
315 current clamp to apply a current injection stimulus to the cells and analysed the rheobase  
316 ( $F(3, 54)=1.08, p=0.36$ , Figure 3C-D). Finally, we quantified the number of action potentials

317 fired at each current injection step (Figure 3E), and there was no effect of treatment (action  
318 potential number:  $F(3, 15)=0.52$ ,  $p=0.68$ , maximum frequency:  $F(3, 15)=0.85$ ,  $p=0.49$ ). The  
319 same membrane properties were also measured at 48 hours of exposure to HL or Hp, with  
320 no effect of treatment across all analyses (data not shown).  
321 Our data indicate that cultured neurons can maintain their intrinsic membrane properties  
322 throughout a one-week exposure to 10  $\mu\text{M}$  HL. This corroborates the finding that there is no  
323 disturbance to ATP levels in these cultures at this concentration.

324

### 325 **10 $\mu\text{M}$ HL reduces AMPA receptor-mediated synaptic currents**

326 We investigated synaptic function in neurons exposed to HL by measuring mEPSCs. These  
327 currents represent the activation of  $\alpha$ -amino-3-hydroxy-5-methyl-4-isoxazolepropionic acid  
328 (AMPA) receptors due to spontaneous fusion of presynaptic vesicles and glutamate release.  
329 There was no change in frequency of mEPSCs (treatment effect  $F(3,54)=1.98$ ,  $p=0.13$ , Figure  
330 4B), but we observed a reduction in amplitude in the presence of HL compared to vehicle  
331 ( $F(3,54)=4.99$ ,  $p=0.004$ , HL vs vehicle  $p=0.001$ , Figure 4C) which was not observed with Hp  
332 co-application ( $p=0.18$ , Figure 4C).

333

334 Next, we quantified unitary EPSPs in connected cell pairs. After a one week exposure to 10  
335  $\mu\text{M}$  HL, the EPSP amplitude was significantly decreased ( $F(3,24)=3.54$ ,  $p=0.03$ , HL vs vehicle  
336  $p=0.01$ , Figure 4D-E) and this effect was prevented when Hp was co-applied to reduce free  
337 Hb (vehicle vs HL + Hp:  $p=0.15$ ). We also quantified the unitary EPSC, which showed a similar  
338 reduction in amplitude in the presence of HL ( $F(3,24)=3.41$ ,  $p=0.034$ , HL vs vehicle  $p=0.015$ )  
339 but not when Hp was also present ( $p=0.16$ , Figure 4G). The paired-pulse ratio was not

340 different across conditions ( $F(3,24)=0.48$ ,  $p=0.70$ ), nor was the failure rate (vehicle:  $3.39 \pm$   
341  $2.2 \%$ , HL  $3.5 \pm 2.7 \%$ ; treatment effect  $F(3,24)=1.57$ ,  $p=0.22$ ).

342

343 When HL and Hp were co-applied, AMPAR currents were not significantly different to HL  
344 alone, but were not different from vehicle conditions either. This indicates Hp was providing  
345 a partial rescue of synaptic AMPAR currents. To ensure Hp was not suppressing AMPAR-  
346 mediated currents, we measured evoked EPSP and EPSC amplitude at a higher  
347 concentration of  $24 \mu\text{M}$  Hp and found no difference to vehicle (EPSP amplitude: vehicle  $1.93$   
348  $\pm 0.34$  mV, Hp  $24 \mu\text{M}$   $2.47 \pm 0.59$  mV,  $p=0.48$ . EPSC current: vehicle  $42.6 \pm 11.7$  pA, Hp  $24$   
349  $\mu\text{M}$   $41.3 \pm 15.2$  pA,  $p=0.95$ .  $N = 3$  pairs).

350

### 351 **10 $\mu\text{M}$ haemolysate reduces GluA1 expression**

352 To assess if the protein levels of one of the major subunit components of AMPA receptors,  
353 GluA1, is affected by HL exposure we prepared protein lysates from cell cultures at DIV21  
354 after one week of incubation with  $10 \mu\text{M}$  HL with or without Hp, and separated using SDS-  
355 PAGE and Western blotting. Membranes were probed for GluA1 and normalised to  $\beta$ -  
356 tubulin. We found a reduction in GluA1 expression in cells exposed to HL ( $F(3,12)=5.12$ ,  $p <$   
357  $0.05$ , HL Vs Vehicle  $p < 0.05$ ) but not when Hp was co-applied ( $p=0.20$ , Figure 5B) indicating  
358 downregulation of GluA1 protein in the presence of unbound Hb.

359

360

### 361 **Discussion**

362 We investigated the effects of Hb at concentrations relevant for SAH on neuronal health and  
363 synaptic activity and determined whether partially scavenging free Hb can prevent  
364 functional deficits in neurons. SAH features a complex variety of pathological mechanisms  
365 contributing to acute damage and secondary brain injury, which have been extensively  
366 reviewed [51–54]. Hb accumulation in the subarachnoid space through haemolysis exposes  
367 neurons to an average peak of 10  $\mu\text{M}$  Hb in CSF, and possibly higher concentrations at the  
368 site of the haematoma. This Hb peak occurs at between 10-12 days after SAH onset, as seen  
369 in human CSF analyses [13,22]. CSF concentrations of Hb have been proposed as a  
370 diagnostic marker for SBI, with a proposed threshold of 7.1  $\mu\text{M}$  of tetrameric Hb [13],  
371 equivalent to 14.2  $\mu\text{M}$  of Hb dimer, hence similar to the present study. In another study, the  
372 average Hb peak concentration in CSF was higher in patients who developed delayed  
373 ischaemic neurological deficits (10 $\mu\text{M}$ ) than those who did not (6  $\mu\text{M}$ ) [55]. This evidence  
374 suggests that the level of CSF Hb is directly linked to SBI and hence poor recovery after SAH.  
375 Scavenging Hb to reduce its concentration in the brain has potential as a therapeutic  
376 intervention, and there is generous timeframe to intervene.

377

378 To first characterise the threshold of free Hb that causes damage within our neuronal  
379 culture model, we measured ATP levels in the presence of Hb for up to one week. We found  
380 that the threshold for damage measured as an ATP deficit at 48 hours (50  $\mu\text{M}$ ) was higher  
381 than that at one week (20  $\mu\text{M}$ ), suggesting Hb neurotoxicity occurs progressively as  
382 previously suggested [16] and impairs ATP levels. This may occur through suppression of  
383 metabolic processes or loss of cells. Primary hippocampal cultures contain glial cells unless  
384 treated with cell cycle inhibitors [56,57], which provide trophic support and may contribute  
385 to ATP levels in these assays. However, evidence suggests that neurons are more vulnerable



386 to Hb-mediated cell loss than glia, as in co-culture models glial cells and oligodendrocytes  
387 appear unaffected by Hb exposure at similar concentrations [14,15,58]. We cannot exclude  
388 effects of HL on glia, or of glial cell contribution to ATP levels and therefore to identify  
389 neuron-specific effects of Hb we immunostained cultured cells for  $\beta$ -tubulin to identify  
390 neurites. We observed neurite beading, indicative of cytoskeletal breakdown such as that  
391 seen in Wallerian degeneration [59] that worsened with increasing concentration of Hb. This  
392 occurred even at 10  $\mu$ M free Hb, where an ATP deficit was not observed, suggesting that  
393 microtubule degradation may occur prior to loss of cells or metabolic deficit. Along the  
394 same lines, degeneration of axons was seen after SAH in humans, as reflected by elevations  
395 in CSF neurofilament-light level [22,60,61], long considered a key marker of  
396 neurodegeneration, and this correlated with preceding CSF Hb concentration [22,62].

397

398 We next investigated the potential of purified human Hp to protect from Hb-mediated  
399 damage, by co-incubating cell cultures with HL and Hp for one week. The differential  
400 efficacy of Hp genotypes in scavenging Hb from the brain and outcome after SAH has been  
401 reviewed previously [63–65] with a general theme that the presence of Hp1 is beneficial.  
402 Hp1-1 and Hp1-2 genotypes cluster closely as having better neuroprotective qualities than  
403 Hp2-2. In this study we have used Hp from pooled human blood plasma, containing both  
404 isoforms but enriched for Hp1 protein, containing approximately 60% Hp1-1 dimer.

405

406 We considered the logistics of Hp infusion into the subarachnoid space containing a peak  
407 CSF concentration of 10  $\mu$ M Hb. Under these conditions, if one aims to bind all free Hb  
408 based on an average molecular weight for Hp monomers of 52.18 kDa within the Hp  
409 preparation used in this study, a CSF Hp concentration of 0.522g/L would need to be

410 achieved. Protein levels in the CSF in healthy individuals vary in the range 0.3-0.4 g/L  
411 [66,67], increasing to 0.7-0.8 g/L after SAH [68]. There is an association between high CSF  
412 protein and poor outcome after SAH, linked to higher rates of SBI [43]. We therefore aimed  
413 to model a sub-stoichiometric, or partial scavenge, of free Hb *in vitro*, to recapitulate the  
414 likely situation *in vivo* more realistically. As discussed in the introduction, a partial scavenge  
415 is more likely to be achievable in a clinical setting due to variable factors in bleed volume  
416 and hence Hb concentration, density of the haematoma and modifications to Hb over time  
417 making it unable to be bound by Hp [13,22,40].

418

419 One previous report suggests that Hp (also from Bio Products Laboratory) can enhance Hb-  
420 mediated neuronal cell loss [69], whilst another study showed that the same Hp formulation  
421 can prevent Hb toxicity in cultured neurons [22]. To investigate the possibility of Hp being  
422 toxic in itself, we tested Hp alone up to high concentration of 120  $\mu\text{M}$  and found no  
423 impairment of ATP levels, in fact a small increase in ATP was found when 30  $\mu\text{M}$  Hp was  
424 applied for one week. After applying HL with or without Hp, we found that ATP levels were  
425 restored to vehicle once free Hb was reduced to  $13.2 \pm 0.7 \mu\text{M}$  or less, regardless of  
426 whether 20 or 50  $\mu\text{M}$  HL had been applied. In microtubule microscopy, complete binding of  
427 all free Hb showed a full restoration of neurite integrity, so that even 50  $\mu\text{M}$  of Hb once in  
428 complex with Hp was no longer damaging to the cells. In conclusion, free Hb must be  
429 reduced to sub-lethal levels of between 13.2-20  $\mu\text{M}$  to prevent neuronal damage as  
430 indicated by ATP deficits within our culture system, and this can be achieved using Hp.  
431 Furthermore, Hp prevents Hb-induced ATP or microtubule impairment. Our results agree  
432 with the recent publication by Garland and colleagues demonstrating that Hp can prevent,  
433 rather than enhance, Hb-mediated toxicity [22].

434

435 Next, we measured the function of neurons in the presence of sub-lethal Hb. Previous  
436 research suggested that Hb can alter membrane potential [50], however the data was  
437 collected at a significantly higher concentration of 0.1 mM Hb, equivalent to 200  $\mu$ M Hb  
438 dimer – a concentration that induced significant loss of ATP in our cultures. We intended to  
439 study the effects of one week exposure to sub-lethal Hb, hence we applied HL at 10  $\mu$ M  
440 which did not result in an ATP deficit in our system and measured intrinsic membrane  
441 properties. We found no change to the resting membrane potential, input resistance or  
442 ability and frequency of firing action potentials when HL was applied for up to one week,  
443 with or without Hp. This data suggests that cultured neurons can maintain their membrane  
444 properties in the presence of 10  $\mu$ M of free Hb. Maintaining a resting membrane potential  
445 around -70 mV in neurons is an active process, as ATP is required to power the sodium  
446 potassium exchange pump and preserve the correct electrochemical gradients across the  
447 cell membrane [70]. Input resistance is affected by a number of factors including the  
448 presence of  $K^+$  leak channels, open synaptic receptor channels and the surface area of cell  
449 membrane [71,72], and affects the excitability of the neuron [73,74]. Correct membrane  
450 potential and input resistance will affect the level of stimuli required to elicit an action  
451 potential, and are necessary to keep neurons at an optimal excitability within the neuronal  
452 network. These measures, in addition to rheobase and action potential number, were  
453 unchanged by 10  $\mu$ M HL. We can conclude from this data that basal membrane properties  
454 and neuron excitability are normal in the presence of 10  $\mu$ M HL, which correlates with a  
455 preservation of normal ATP levels under these conditions.

456

457 We also studied neurotransmission in neuron cultures, especially since prior evidence  
458 showed biochemical changes in synaptic composition [21,22,75] and cognitive impairment  
459 after SAH [25,26,76]. We focused on AMPA glutamate receptors, as much of the fast  
460 excitatory neurotransmission in the hippocampus is mediated by these tetrameric  
461 ionotropic receptors. Rapid depolarisation through AMPARs is typically required to enable  
462 action potential firing, following a summated postsynaptic response. We found a reduction  
463 in the amplitude of mEPSCs, evoked EPSPs and EPSCs after HL incubation, which provides  
464 strong evidence for a reduction in the number of AMPA receptors at the postsynaptic site of  
465 recorded neurons. Using Western blotting we also observed a reduction in GluA1 subunit  
466 expression in cell cultures, similar to previous research [75]. GluA1 is present in the majority  
467 of AMPA receptors in the hippocampus [77–79] and as such, a reduction in expression is  
468 likely to at least partially explain the reduction in amplitude of excitatory currents. This  
469 finding is similar to that previously seen in a mouse model of early Alzheimer’s disease [80],  
470 indicating shared features of AMPAR downregulation in neurodegeneration.

471

472 Previous research suggests that Hb can also potentiate the excitotoxic effects of other  
473 molecules, such as in the presence of excess neurotransmitters [81]. Glutamate-mediated  
474 neurotoxicity has been implicated in ischaemic and haemorrhagic stroke [53,82,83] and  
475 lesions in SAH follow the functional neuroanatomy rather than vascular architecture [83].  
476 Iron levels after haemorrhage may play a role in this process by altering glutamate uptake  
477 [84]. Excess glutamate causing excitotoxicity can drive AMPAR internalisation and  
478 degradation leading to synaptic depression [70] in a homeostatic downscaling mechanism to  
479 preserve neuronal excitability [85].

480

481 Other contributing factors include alterations to receptor trafficking, which may link to the  
482 degree of neurite beading observed in the presence of free Hb. Degradation of microtubules  
483 within neurites will disrupt transport pathways within the cell, disturbing intracellular  
484 trafficking [86]. This could impair the trafficking of newly synthesised AMPA receptors to  
485 synaptic sites, which may have significant implications for synaptic plasticity. Hippocampal  
486 LTP requires the insertion of AMPA receptors into the synaptic membrane [87–89], and  
487 disruptions to trafficking via microtubules in addition to GluA1 protein downregulation will  
488 result in a lower availability of AMPA receptors available to enable long term potentiation  
489 mechanisms. These mechanisms may explain the loss of hippocampal LTP in a rat model of  
490 SAH [25], and since LTP is proposed to underpin many learning and memory processes [90],  
491 functional recovery after SAH is also likely impaired by changes to AMPAR availability.

492

493 The reduction in AMPAR-mediated currents observed in this study occurred at sublethal  
494 concentrations of free Hb which did not impair ATP or cause overt cell death, indicating that  
495 neurons in brain regions exposed to low levels of Hb may be surviving but are functionally  
496 impaired. Surviving cells exposed to Hb concentrations greater than 10  $\mu\text{M}$  are likely to have  
497 even greater impairments in AMPA receptor-driven excitation, as evidence suggests that a  
498 reduction in ATP, as seen in our assays at 20  $\mu\text{M}$  HL and above, leads to imbalance of  $\text{Ca}^{2+}$ ,  
499  $\text{Na}^+$ ,  $\text{Ca}^{2+}$  and  $\text{Cl}^-$  ions, inhibiting glutamate reuptake [82]. However, we have not measured  
500 currents at greater HL concentrations using electrophysiology in this study, as visually  
501 guided patch clamp would be subject to selection bias of surviving cells.

502

503 We did not find any changes to presynaptic measures, including mEPSC frequency, evoked  
504 EPSP failure rate or paired-pulse facilitation. We also measured  $\text{GABA}_A$  mIPSCs and found no

505 change to frequency or amplitude (data not shown) suggesting sublethal Hb selectively  
506 impairs the postsynaptic element of AMPAR-mediated excitatory neurotransmission.

507

508 Throughout our data on AMPA receptor-mediated transmission deficits, we have seen that  
509 partially scavenging free Hb is sufficient to prevent a significant deficit. Hp binding of free  
510 Hb sequesters it in large stable complexes, preventing release of haem and  
511 compartmentalising the pathological species [91,92]. In this study it is likely that although  
512 we have only sequestered one-third of free Hb, this is sufficient to reduce a 10  $\mu\text{M}$   
513 concentration of Hb dimers to levels below the threshold for excitotoxicity or alteration to  
514 synapses; this is promising for the therapeutic potential of Hp.

515

516 It is also possible that Hp in itself has beneficial effects beyond binding Hb – for example Hp  
517 is well known as an anti-inflammatory protein, expressed in the acute phase response  
518 [93,94]. Since Hb breakdown products can activate inflammatory pathways in SAH  
519 [10,95,96] leading to activation of microglia and their conversion to harmful secretory  
520 phenotypes [9,97], Hp may provide neuroprotection beyond scavenging Hb through its anti-  
521 inflammatory effects. On its own, Hp did not impair ATP, and in fact a small increase in ATP  
522 levels was observed in neuronal cultures when incubated at 30  $\mu\text{M}$  but no change from  
523 vehicle conditions was found at higher concentrations up to 120  $\mu\text{M}$ . Neurite morphology  
524 was not altered by Hp, nor were intrinsic membrane properties or AMPA receptor-mediated  
525 excitatory currents. At the highest Hp concentration used in our study, Hp levels in culture  
526 medium were significantly higher than plasma concentrations [22] or those that would be  
527 delivered intrathecally for treatment of SAH, which is reassuring.

528

529 In conclusion, we isolated Hb neurotoxicity in a neuronal culture model of SAH and  
530 observed a dose-dependent impairment of ATP levels and neurite integrity upon long-term  
531 exposure to Hb. Clinically relevant, sub-lethal concentrations of Hb caused downregulation  
532 of AMPA receptors at the synapse, which may be due to a combination of altered protein  
533 expression levels and trafficking disruption from microtubule disintegration. Partially  
534 scavenging of one-third of free Hb using Hp was sufficient to restore AMPA and ATP deficits  
535 at 10-20  $\mu$ M of HL, and Hp itself showed no negative effects even at very high  
536 concentrations. This data helps explain neurological deficits after SAH, and supports the  
537 development of Hp as a therapeutic agent to reduce the impact of secondary brain injury  
538 after SAH.

539

540

#### 541 List of abbreviations

542 **AMPA:**  $\alpha$ -amino-3-hydroxy-5-methyl-4-isoxazolepropionic acid, **ATP:** adenosine  
543 triphosphate, **CSF:** cerebrospinal fluid, **DIV:** day *in vitro*, **EPSC:** excitatory postsynaptic  
544 current, **EPSP:** excitatory postsynaptic potential, **Hb:** haemoglobin, **Hp:** haptoglobin, **mEPSC:**  
545 miniature excitatory postsynaptic current, **RBC:** red blood cell, **SAH:** subarachnoid  
546 haemorrhage, **SBI:** secondary brain injury.

547

548

549

#### 550 Declarations

551 Ethics Approval

552 Human blood was used with consent (National research Ethics approval 12/SC/0176).

553 Animal work was conducted in accordance with the Animals (Scientific Procedures) Act 1986

554 as approved by the UK Home Office.

555

556 Consent for publication

557 Not applicable.

558

559 Availability of data and material

560 The datasets used and/or analysed during the current study available from the

561 corresponding authors on reasonable request.

562

563 Disclosures

564 Authors PG and JM are employed by Bio Products Laboratory Ltd, and supplied Hp for the

565 study. Design, execution and analysis of experiments were carried out independently of Bio

566 Products Laboratory Ltd.

567

568 Funding

569 This study was funded by the Gerald Kerkut Charitable Trust and Institute for Life Sciences,

570 University of Southampton.

571

572 Authors' contributions

573 HW, KD, DB, IG, and MVC designed experiments. H.W. performed experiments HW, KD and

574 MVC and analysed the data. Haptoglobin was obtained and supplied by PG and JM All

575 authors approved the manuscript.



576

577 Acknowledgements

578 The authors thank Dr Charlotte Stuart for supply of human RBCs, and to Dr Mark Willett and  
579 the Imaging and Microscopy Centre at University of Southampton for training and support in  
580 this research.

581

582 References

- 583 1. Petridis AK, Kamp MA, Cornelius JF, Beez T, Beseoglu K, Turowski B, et al. Aneurysmal  
584 subarachnoid hemorrhage—diagnosis and treatment. *Dtsch. Arztebl. Int. Deutscher Arzte-*  
585 *Verlag GmbH*; 2017. p. 226–35.
- 586 2. Hackett ML, Anderson CS. Health outcomes 1 year after subarachnoid hemorrhage an  
587 international population-based study. *Neurology*. Wolters Kluwer Health, Inc. on behalf of  
588 the American Academy of Neurology; 2000;55:658–62.
- 589 3. English SW. Long-Term Outcome and Economic Burden of Aneurysmal Subarachnoid  
590 Hemorrhage: Are we Only Seeing the Tip of the Iceberg? [Internet]. *Neurocrit. Care*.  
591 Springer; 2020. p. 37–8.
- 592 4. Luoma A, Reddy U. Acute management of aneurysmal subarachnoid haemorrhage. *Contin*  
593 *Educ Anaesth Crit Care Pain*. Narnia; 2013;13:52–8.
- 594 5. Diringner MN. Management of aneurysmal subarachnoid hemorrhage. *Crit Care Med*. NIH  
595 Public Access; 2009;37:432–40.
- 596 6. Diringner MN, Bleck TP, Hemphill JC, Menon D, Shutter L, Vespa P, et al. Critical care  
597 management of patients following aneurysmal subarachnoid hemorrhage:  
598 recommendations from the Neurocritical Care Society's Multidisciplinary Consensus  
599 Conference. *Neurocrit Care*. *Neurocrit Care*; 2011;15:211–40.
- 600 7. Van Gijn J, Rinkel GJE. Subarachnoid haemorrhage: Diagnosis, causes and management.  
601 *Brain*. Oxford University Press; 2001. p. 249–78.
- 602 8. Yeh LH, Alayash AI. Redox side reactions of haemoglobin and cell signalling mechanisms. *J*  
603 *Intern Med*. John Wiley & Sons, Ltd; 2003. p. 518–26.
- 604 9. Kwon MS, Woo SK, Kurland DB, Yoon SH, Palmer AF, Banerjee U, et al. Methemoglobin is  
605 an endogenous Toll-like receptor 4 ligand—relevance to subarachnoid hemorrhage. *Int J*

- 606 Mol Sci. MDPI AG; 2015;16:5028–46.
- 607 10. Belcher JD, Chen C, Nguyen J, Milbauer L, Abdulla F, Alayash AI, et al. Heme triggers TLR4  
608 signaling leading to endothelial cell activation and vaso-occlusion in murine sickle cell  
609 disease. *Blood*. American Society of Hematology; 2014;123:377–90.
- 610 11. Joerk A, Seidel RA, Walter SG, Wiegand A, Kahnes M, Klopfleisch M, et al. Impact of  
611 heme and heme degradation products on vascular diameter in mouse visual cortex. *J Am*  
612 *Heart Assoc*. John Wiley and Sons Inc.; 2014;3.
- 613 12. Hugelshofer M, Buzzi RM, Schaer CA, Richter H, Akeret K, Anagnostakou V, et al.  
614 Haptoglobin administration into the subarachnoid space prevents hemoglobin-induced  
615 cerebral vasospasm. *J Clin Invest*. American Society for Clinical Investigation; 2019;129:5219.
- 616 13. Akeret K, Buzzi RM, Schaer CA, Thomson BR, Vallelian F, Wang S, et al. Cerebrospinal  
617 fluid hemoglobin drives subarachnoid hemorrhage-related secondary brain injury. *J Cereb*  
618 *Blood Flow Metab*. *J Cereb Blood Flow Metab*; 2021;41:3000–15.
- 619 14. Regan RF, Panter SS. Neurotoxicity of hemoglobin in cortical cell culture. *Neurosci Lett*.  
620 1993;153:219–22.
- 621 15. Jungner Å, Vallius Kvist S, Romantsik O, Bruschetti M, Ekström C, Bendix I, et al. White  
622 Matter Brain Development after Exposure to Circulating Cell-Free Hemoglobin and  
623 Hyperoxia in a Rat Pup Model. *Res Artic Dev Neurosci*. 2019;41:234–46.
- 624 16. Wang X, Mori T, Sumii T, Lo EH. Hemoglobin-induced cytotoxicity in rat cerebral cortical  
625 neurons: Caspase activation and oxidative stress. *Stroke*. Lippincott Williams & Wilkins;  
626 2002;33:1882–8.
- 627 17. Garton TP, He Y, Garton HJL, Keep RF, Xi G, Strahle JM. Hemoglobin-induced neuronal  
628 degeneration in the hippocampus after neonatal intraventricular hemorrhage. *Brain Res*.  
629 Elsevier; 2016;1635:86–94.
- 630 18. Zille M, Karuppagounder SS, Chen Y, Gough PJ, Bertin J, Finger J, et al. Neuronal Death  
631 after Hemorrhagic Stroke in Vitro and in Vivo Shares Features of Ferroptosis and  
632 Necroptosis. *Stroke*. Lippincott Williams and Wilkins; 2017;48:1033–43.
- 633 19. Li Q, Han X, Lan X, Gao Y, Wan J, Durham F, et al. Inhibition of neuronal ferroptosis  
634 protects hemorrhagic brain. *JCI Insight*. American Society for Clinical Investigation; 2017;2.
- 635 20. Bai Q, Liu J, Wang G. Ferroptosis, a Regulated Neuronal Cell Death Type After  
636 Intracerebral Hemorrhage. *Front Cell Neurosci*. Frontiers Media S.A.; 2020;14:374.
- 637 21. Shen H, Chen Z, Wang Y, Gao A, Li H, Cui Y, et al. Role of Neurexin-1 $\beta$  and Neuroligin-1 in

- 638 Cognitive Dysfunction after Subarachnoid Hemorrhage in Rats. *Stroke*. Lippincott Williams &  
639 Wilkins Hagerstown, MD; 2015;46:2607–15.
- 640 22. Garland P, Morton MJ, Haskins W, Zolnourian A, Durnford A, Gaastra B, et al.  
641 Haemoglobin causes neuronal damage in vivo which is preventable by haptoglobin. *Brain*  
642 *Commun. Oxford Academic*; 2020;2.
- 643 23. Sasaki T, Hoffmann U, Kobayashi M, Sheng H, Ennaceur A, Lombard FW, et al. Long-Term  
644 Cognitive Deficits After Subarachnoid Hemorrhage in Rats. *Neurocrit Care*. Springer US;  
645 2016;25:293–305.
- 646 24. Bliss TVP, Collingridge GL. A synaptic model of memory: long-term potentiation in the  
647 hippocampus. *Nature*. 1993;361:31–9.
- 648 25. Tariq A, Ai J, Chen G, Sabri M, Jeon H, Shang X, et al. Loss of long-term potentiation in  
649 the hippocampus after experimental subarachnoid hemorrhage in rats. *Neuroscience*.  
650 Pergamon; 2010;165:418–26.
- 651 26. Al-Khindi T, Macdonald RL, Schweizer TA. Cognitive and functional outcome after  
652 aneurysmal subarachnoid hemorrhage. *Stroke*. Lippincott Williams & Wilkins; 2010;41.
- 653 27. Tidswell P, Dias PS, Sagar HJ, Mayes AR, Battersby RDE. Cognitive outcome after  
654 aneurysm rupture: Relationship to aneurysm site and perioperative complications.  
655 *Neurology*. Wolters Kluwer Health, Inc. on behalf of the American Academy of Neurology;  
656 1995;45:876–82.
- 657 28. Patel BN, Dunn RJ, Jeong SY, Zhu Q, Julien JP, David S. Ceruloplasmin regulates iron  
658 levels in the CNS and prevents free radical injury. *J Neurosci*. 2002;22:6578–86.
- 659 29. Núñez MT, Urrutia P, Mena N, Aguirre P, Tapia V, Salazar J. Iron toxicity in  
660 neurodegeneration. *BioMetals*. 2012;25:761–76.
- 661 30. Penke L, Valdés Hernández MC, Maniega SM, Gow AJ, Murray C, Starr JM, et al. Brain  
662 iron deposits are associated with general cognitive ability and cognitive aging. *Neurobiol*  
663 *Aging*. Elsevier; 2012;33:510-517.e2.
- 664 31. Jellinger KA. The role of iron in neurodegeneration. Prospects for pharmacotherapy of  
665 Parkinson's disease. *Drugs and Aging*. 1999. p. 115–40.
- 666 32. Thomsen JH, Etzerodt A, Svendsen P, Moestrup SK. The haptoglobin-CD163-heme  
667 oxygenase-1 pathway for hemoglobin scavenging. *Oxid Med Cell Longev*. Hindawi Limited;  
668 2013;2013:523652.
- 669 33. Kazmi N, Koda Y, Ndiaye NC, Visvikis-Siest S, Morton MJ, Gaunt TR, et al. Genetic

- 670 determinants of circulating haptoglobin concentration. *Clin Chim Acta*. Elsevier;  
671 2019;494:138–42.
- 672 34. Galea J, Cruickshank G, Teeling JL, Boche D, Garland P, Perry VH, et al. The intrathecal  
673 CD163-haptoglobin-hemoglobin scavenging system in subarachnoid hemorrhage. *J*  
674 *Neurochem*. Wiley-Blackwell; 2012;121:785–92.
- 675 35. Boretti FS, Buehler PW, D’Agnillo F, Kluge K, Glaus T, Butt OI, et al. Sequestration of  
676 extracellular hemoglobin within a haptoglobin complex decreases its hypertensive and  
677 oxidative effects in dogs and guinea pigs. *J Clin Invest*. American Society for Clinical  
678 Investigation; 2009;119:2271–80.
- 679 36. Gando S, Tedo I. The effects of massive transfusion and haptoglobin therapy on  
680 hemolysis in trauma patients. *Surg Today*. 1994;24:785–90.
- 681 37. Schaer DJ, Buehler PW, Alayash AI, Belcher JD, Vercellotti GM. Hemolysis and free  
682 hemoglobin revisited: exploring hemoglobin and heme scavengers as a novel class of  
683 therapeutic proteins. *Blood*. 2013;121:1276–84.
- 684 38. Siddiqui FM, Bekker S V., Qureshi AI. Neuroimaging of Hemorrhage and Vascular Defects.  
685 *Neurotherapeutics*. Springer; 2011;8:28.
- 686 39. Janick PA, Hackney DB, Grossman RI, Asakura T. MR imaging of various oxidation states  
687 of intracellular and extracellular hemoglobin. *Am J Neuroradiol*. American Society of  
688 Neuroradiology; 1991;12:891–7.
- 689 40. Zhou J, Guo P, Guo Z, Sun X, Chen Y, Feng H. Fluid metabolic pathways after  
690 subarachnoid hemorrhage [Internet]. *J. Neurochem*. John Wiley & Sons, Ltd; 2022. p. 13–33.
- 691 41. Galea I, Durnford A, Glazier J, Mitchell S, Kohli S, Foulkes L, et al. Iron Deposition in the  
692 Brain after Aneurysmal Subarachnoid Hemorrhage. *Stroke*. *Stroke*; 2022;53:1633–42.
- 693 42. Galea I. The blood-brain barrier in systemic infection and inflammation. *Cell Mol*  
694 *Immunol*. *Cell Mol Immunol*; 2021;18:2489–501.
- 695 43. Nadkarni NA, Maas MB, Batra A, Kim M, Manno EM, Sorond FA, et al. Elevated  
696 Cerebrospinal Fluid Protein Is Associated with Unfavorable Functional Outcome in  
697 Spontaneous Subarachnoid Hemorrhage. *J Stroke Cerebrovasc Dis*. 2020;29:104605.
- 698 44. Benesch RE, Benesch R, Yung S. Equations for the spectrophotometric analysis of  
699 hemoglobin mixtures. *Anal Biochem*. Academic Press; 1973;55:245–8.
- 700 45. Schindelin J, Arganda-Carreras I, Frise E, Kaynig V, Longair M, Pietzsch T, et al. Fiji: an  
701 open-source platform for biological-image analysis. *Nat Methods* 2012 97. Nature Publishing

- 702 Group; 2012;9:676–82.
- 703 46. Gibb AJ, Edwards FA. Patch clamp recording from cells in sliced tissues. *Microelectrode*  
704 *Tech Plymouth Work Handb.* 1994;255–74.
- 705 47. Schilling T, Eder C. Microglial K<sup>+</sup> channel expression in young adult and aged mice. *Glia.*  
706 *John Wiley & Sons, Ltd; 2015;63:664–72.*
- 707 48. Stewart RR. Membrane properties of microglial cells isolated from the leech central  
708 nervous system. *Proc R Soc London Ser B Biol Sci. The Royal Society London; 1994;255:201–*  
709 *8.*
- 710 49. Winchester G, Liu S, Steele OG, Aziz W, Penn A. Eventer. Software for the detection of  
711 spontaneous synaptic events measured by electrophysiology or imaging. 2020;
- 712 50. Yip S, Ip JKH, Sastry BR. Electrophysiological actions of hemoglobin on rat hippocampal  
713 CA1 pyramidal neurons. *Brain Res. Elsevier; 1996;713:134–42.*
- 714 51. Budohoski KP, Guilfoyle M, Helmy A, Huuskonen T, Czosnyka M, Kirillos R, et al. The  
715 pathophysiology and treatment of delayed cerebral ischaemia following subarachnoid  
716 haemorrhage [Internet]. *J. Neurol. Neurosurg. Psychiatry. BMJ Publishing Group Ltd; 2014.*  
717 *p. 1343–53.*
- 718 52. Neifert SN, Chapman EK, Martini ML, Shuman WH, Schupper AJ, Oermann EK, et al.  
719 Aneurysmal Subarachnoid Hemorrhage: the Last Decade [Internet]. *Transl. Stroke Res.*  
720 *Springer; 2021. p. 428–46.*
- 721 53. Righy C, T. Bozza M, F. Oliveira M, A. Bozza F. Molecular, Cellular and Clinical Aspects of  
722 Intracerebral Hemorrhage: Are the Enemies Within? *Curr Neuropharmacol.* 2015;14:392–  
723 402.
- 724 54. Cahill WJ, Calvert JH, Zhang JH. Mechanisms of early brain injury after subarachnoid  
725 hemorrhage [Internet]. *J. Cereb. Blood Flow Metab. Nature Publishing Group; 2006. p.*  
726 *1341–53.*
- 727 55. Hugelshofer M, Sikorski CM, Seule M, Deuel J, Muroi CI, Seboek M, et al. Cell-Free  
728 Oxyhemoglobin in Cerebrospinal Fluid After Aneurysmal Subarachnoid Hemorrhage:  
729 Biomarker and Potential Therapeutic Target. *World Neurosurg. Elsevier Inc.;*  
730 *2018;120:e660–6.*
- 731 56. Hilgenberg LGW, Smith MA. Preparation of Dissociated Mouse Cortical Neuron Cultures.  
732 *J Vis Exp.* 2007;
- 733 57. Hui CW, Zhang Y, Herrup K. Non-Neuronal Cells Are Required to Mediate the Effects of

- 734 Neuroinflammation: Results from a Neuron-Enriched Culture System. PLoS One. Public  
735 Library of Science; 2016;11.
- 736 58. Regan RF, Guo Y. Toxic effect of hemoglobin on spinal cord neurons in culture. J  
737 Neurotrauma. Mary Ann Liebert Inc.; 1998;15:645–53.
- 738 59. Garland P, Broom LJ, Quraisha S, Dalton PD, Skipp P, Newman TA, et al. Soluble  
739 axoplasm enriched from injured CNS axons reveals the early modulation of the actin  
740 cytoskeleton. PLoS One. PLoS One; 2012;7.
- 741 60. Petzold A, Keir G, Kay A, Kerr M, Thompson EJ. Axonal damage and outcome in  
742 subarachnoid haemorrhage. J Neurol Neurosurg Psychiatry. BMJ Publishing Group Ltd;  
743 2006;77:753–9.
- 744 61. Nylén K, Csajbok LZ, Öst M, Rashid A, Karlsson JE, Blennow K, et al. CSF –Neurofilament  
745 correlates with outcome after aneurysmal subarachnoid hemorrhage. Neurosci Lett.  
746 Elsevier; 2006;404:132–6.
- 747 62. Garland P, Morton M, Zolnourian A, Durnford A, Gaastra B, Toombs J, et al.  
748 Neurofilament light predicts neurological outcome after subarachnoid haemorrhage. Brain.  
749 Brain; 2021;144:761–8.
- 750 63. Gaastra B, Glazier J, Bulters D, Galea I. Haptoglobin Genotype and Outcome after  
751 Subarachnoid Haemorrhage: New Insights from a Meta-Analysis. Oxid Med Cell Longev.  
752 Hindawi; 2017;2017:1–9.
- 753 64. Gaastra B, Ren D, Alexander S, Bennett ER, Bielawski DM, Blackburn SL, et al.  
754 Haptoglobin genotype and aneurysmal subarachnoid hemorrhage individual patient data  
755 analysis. Neurology. Lippincott Williams and Wilkins; 2019;92:E2150–64.
- 756 65. Sadrzadeh SMH, Bozorgmehr J. Haptoglobin phenotypes in health and disorders. Am. J.  
757 Clin. Pathol. 2004.
- 758 66. Kwon SK, Kim MW. Pseudo-Froin’s syndrome, xanthochromia with high protein level of  
759 cerebrospinal fluid. Korean J Anesthesiol. Korean Society of Anesthesiologists; 2014;67:S58.
- 760 67. McCudden CR, Brooks J, Figurado P, Bourque PR. Cerebrospinal Fluid Total Protein  
761 Reference Intervals Derived from 20 Years of Patient Data. Clin Chem. Clin Chem;  
762 2017;63:1856–65.
- 763 68. Jeffcote T, Ho KM. Associations between cerebrospinal fluid protein concentrations,  
764 serum albumin concentrations and intracranial pressure in neurotrauma and intracranial  
765 haemorrhage. Anaesth Intensive Care. Australian Society of Anaesthetists; 2010;38:274–9.

- 766 69. Chen-Roetling J, Regan RF. Haptoglobin increases the vulnerability of CD163-expressing  
767 neurons to hemoglobin. *J Neurochem.* Wiley/Blackwell (10.1111); 2016;139:586–95.
- 768 70. Zhang D, Hou Q, Wang M, Lin A, Jarzylo L, Navis A, et al. Na,K-ATPase Activity Regulates  
769 AMPA Receptor Turnover through Proteasome-Mediated Proteolysis. *J Neurosci.* Society for  
770 Neuroscience; 2009;29:4498–511.
- 771 71. Li Y-X, Zhang Y, Lester HA, Schuman EM, Davidson N. Enhancement of Neurotransmitter  
772 Release Induced by Brain-Derived Neurotrophic Factor in Cultured Hippocampal Neurons.  
773 1998;
- 774 72. Breakdown S, Schmidt-hieber C, Jonas P, Bischofberger J, Jones P, Bischofberger J.  
775 Enhanced synaptic plasticity in newly generated granule cells of the adult hippocampus.  
776 *Nature.* Nature Publishing Group; 2004;429:184–7.
- 777 73. Kaczmarek LK, Jennings KR, Strumwasser F, Nairn AC, Walter U, Wilson FD, et al.  
778 Microinjection of catalytic subunit of cyclic AMP-dependent protein kinase enhances  
779 calcium action potentials of bag cell neurons in cell culture. *Proc Natl Acad Sci. Proceedings*  
780 *of the National Academy of Sciences*; 1980;77:7487–91.
- 781 74. Sun Z, Williams DJ, Xu B, Gogos JA. Altered function and maturation of primary cortical  
782 neurons from a 22q11.2 deletion mouse model of schizophrenia. *Transl Psychiatry.* Nature  
783 Publishing Group; 2018;8:1–14.
- 784 75. Han SM, Wan H, Kudo G, Foltz WD, Vines DC, Green DE, et al. Molecular alterations in  
785 the hippocampus after experimental subarachnoid hemorrhage. *J Cereb Blood Flow Metab.*  
786 SAGE Publications; 2014;34:108–17.
- 787 76. Ellmore TM, Rohlfss F, Khursheed F. FMRI of working memory impairment after recovery  
788 from subarachnoid hemorrhage. *Front Neurol.* Frontiers Media SA; 2013;4:179.
- 789 77. Schwenk J, Baehrens D, Haupt A, Bildl W, Boudkkazi S, Roeper J, et al. Regional Diversity  
790 and Developmental Dynamics of the AMPA-Receptor Proteome in the Mammalian Brain.  
791 *Neuron.* Cell Press; 2014;84:41–54.
- 792 78. Lu W, Shi Y, Jackson AC, Bjorgan K, During MJ, Sprengel R, et al. Subunit Composition of  
793 Synaptic AMPA Receptors Revealed by a Single-Cell Genetic Approach. *Neuron.* Elsevier Inc.;  
794 2009;62:254–68.
- 795 79. Wenthold RJ, Petralia RS, Blahos J, Niedzielski AS, Blahos J II, Niedzielski AS. Evidence for  
796 multiple AMPA receptor complexes in hippocampal CA1/CA2 neurons. *J Neurosci.* Society  
797 for Neuroscience; 1996;16:1982–9.

- 798 80. Chang EH, Savage MJ, Flood DG, Thomas JM, Levy RB, Mahadomrongkul V, et al. AMPA  
799 receptor downscaling at the onset of Alzheimer's disease pathology in double knockin mice.  
800 Proc Natl Acad Sci U S A. National Academy of Sciences; 2006;103:3410–5.
- 801 81. Regan RF, Scott Panter S. Hemoglobin potentiates excitotoxic injury in cortical cell  
802 culture. J Neurotrauma. Mary Ann Liebert Inc.; 1996;13:223–31.
- 803 82. Nagy Z, Nardai S. Cerebral ischemia/reperfusion injury: From bench space to bedside.  
804 Brain Res. Bull. Elsevier; 2017. p. 30–7.
- 805 83. Schatlo B, Dreier JP, Gläsker S, Fathi AR, Moncrief T, Oldfield EH, et al. Report of  
806 selective cortical infarcts in the primate clot model of vasospasm after subarachnoid  
807 hemorrhage. Neurosurgery. 2010;67:721–8.
- 808 84. Yu J, Guo Y, Sun M, Li B, Zhang Y, Li C. Iron is a potential key mediator of glutamate  
809 excitotoxicity in spinal cord motor neurons. Brain Res. Elsevier; 2009;1257:102–7.
- 810 85. Hou Q, Gilbert J, Man HY. Homeostatic regulation of AMPA receptor trafficking and  
811 degradation by light-controlled single-synaptic activation. Neuron. Cell Press; 2011;72:806–  
812 18.
- 813 86. Sadleir KR, Kandalepas PC, Buggia-Prévot V, Nicholson DA, Thinakaran G, Vassar R.  
814 Presynaptic dystrophic neurites surrounding amyloid plaques are sites of microtubule  
815 disruption, BACE1 elevation, and increased A $\beta$  generation in Alzheimer's disease. Acta  
816 Neuropathol. Springer Verlag; 2016;132:235–56.
- 817 87. Kessels HW, Malinow R. Synaptic AMPA Receptor Plasticity and Behavior. Neuron. Cell  
818 Press; 2009. p. 340–50.
- 819 88. Benke T, Traynelis SF. AMPA-Type Glutamate Receptor Conductance Changes and  
820 Plasticity: Still a Lot of Noise. Neurochem Res. Springer New York LLC; 2019;44:539–48.
- 821 89. Gu J, Lee CW, Fan Y, Komlos D, Tang X, Sun C, et al. ADF/cofilin-mediated actin dynamics  
822 regulate AMPA receptor trafficking during synaptic plasticity. Nat Neurosci. Nature  
823 Publishing Group; 2010;13:1208–15.
- 824 90. Bliss TVP, Collingridge GL. A synaptic model of memory: Long-term potentiation in the  
825 hippocampus. Nature. 1993. p. 31–9.
- 826 91. Schaer CA, Jeger V, Gentinetta T, Spahn DR, Valleliau F, Rudiger A, et al. Haptoglobin  
827 treatment prevents cell-free hemoglobin exacerbated mortality in experimental rat sepsis.  
828 Intensive Care Med. Exp. SpringerOpen; 2021. p. 1–4.
- 829 92. Buehler PW, Humar R, Schaer DJ. Haptoglobin Therapeutics and Compartmentalization



830 of Cell-Free Hemoglobin Toxicity. Trends Mol Med. Elsevier Current Trends; 2020;26:683–  
831 97.

832 93. Moestrup S, Møller H. CD163: a regulated hemoglobin scavenger receptor with a role in  
833 the anti-inflammatory response. Ann Med. Taylor & Francis; 2004;36:347–54.

834 94. Landis RC, Philippidis P, Domin J, Boyle JJ, Haskard DO. Haptoglobin Genotype-  
835 Dependent Anti-Inflammatory Signaling in CD163(+) Macrophages. Int J Inflam. Hindawi;  
836 2013;2013:980327.

837 95. Rosi MC, Luccarini I, Grossi C, Fiorentini A, Spillantini MG, Prisco A, et al. \* Department  
838 of Preclinical and Clinical Pharmacology, University of Florence, Florence, Italy Department  
839 of Clinical Neurosciences, Brain Repair Centre, University of Cambridge, Cambridge, UK à  
840 Istituto di Genetica e Biofisica “A. Buzzati Traverso”, CN. J Neurochem. 2010;112:1539–51.

841 96. Fassbender K, Hodapp B, Rossol S, Bertsch T, Schmeck J, Schütt S, et al. Inflammatory  
842 cytokines in subarachnoid haemorrhage: association with abnormal blood flow velocities in  
843 basal cerebral arteries. J Neurol Neurosurg Psychiatry. BMJ Publishing Group Ltd;  
844 2001;70:534–7.

845 97. You W, Wang Z, Li H, Shen H, Xu X, Jia G, et al. Inhibition of mammalian target of  
846 rapamycin attenuates early brain injury through modulating microglial polarization after  
847 experimental subarachnoid hemorrhage in rats. J Neurol Sci. Elsevier; 2016;367:224–31.  
848

849

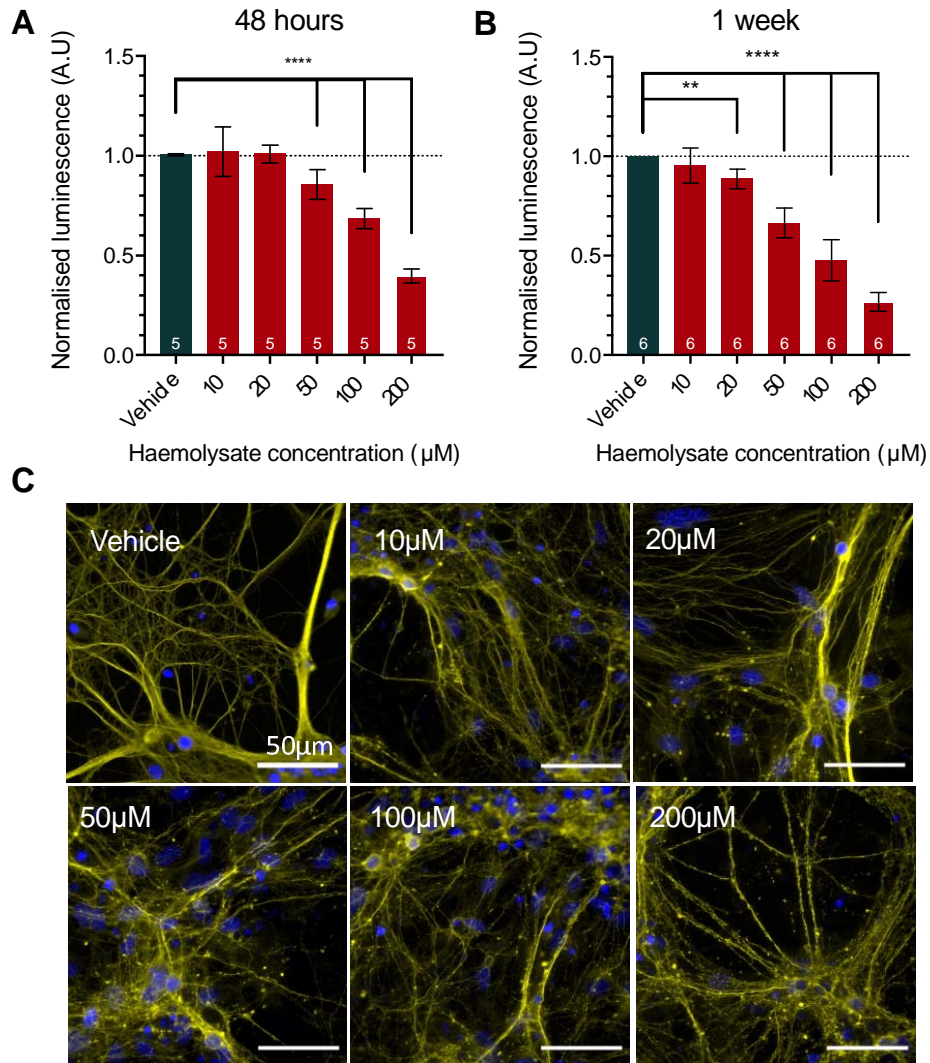

**Figure 1. Haemolysate impairs ATP levels and neurites in cultured neurons.** Primary hippocampal neurons were incubated with haemolysate from DIV14. A) The CellTiter Glo assay found a reduction in ATP concentration after 48 hours and B) one week of exposure to haemolysate. C) Immunofluorescent staining of  $\beta$  tubulin shows disruption of cytoskeletal microtubules as neurite beading in the presence of haemolysate after one week. Significance levels: \*\* =  $P < 0.01$ , \*\*\*\* =  $P < 0.0001$ .

850

851

852

853

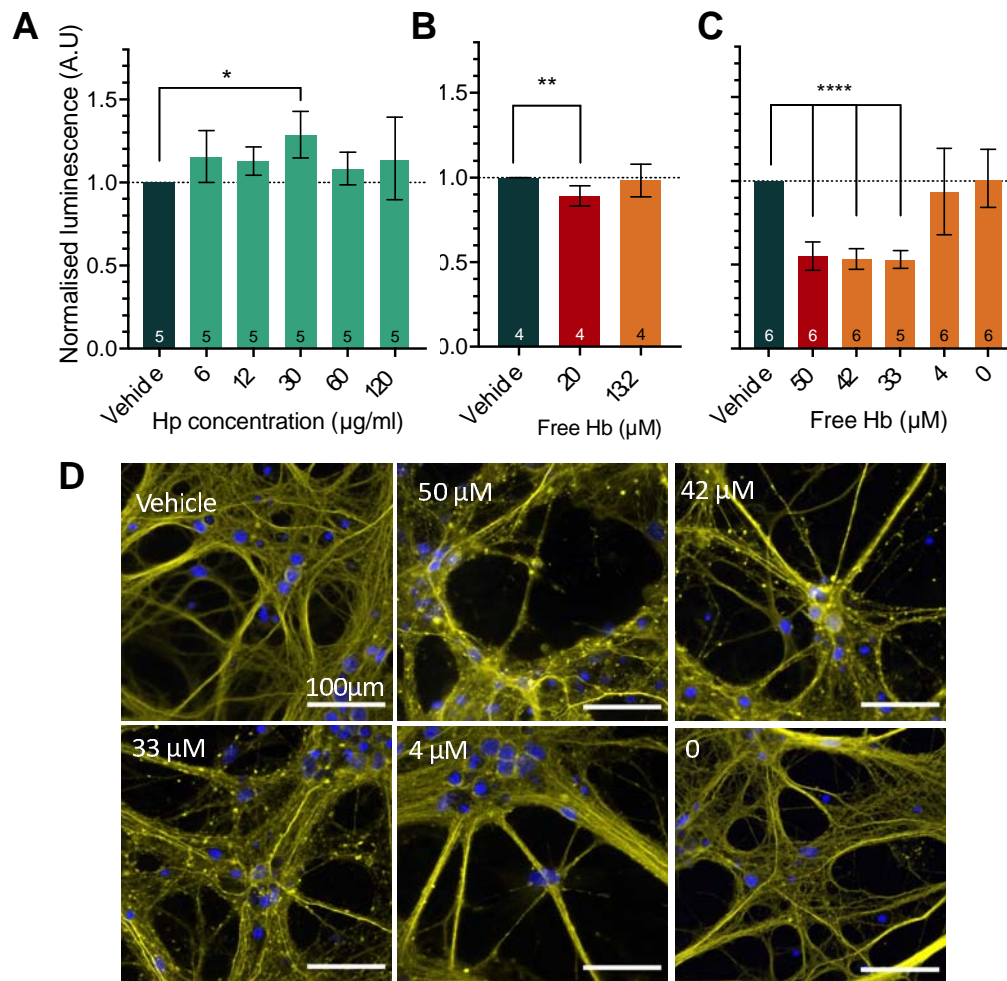

Figure 2. **Haptoglobin can prevent deficits in ATP and neurite structure caused by haemolysate.** A) ATP concentration in cultured neurons after one week of exposure to haptoglobin up to 120 µM. B) ATP levels after incubation with 20 µM HL (red bars) and co-application of Hp to scavenge one-third of free Hb (orange). C) 50 µM HL co-applied with increasing amounts of Hp to scavenge free Hb. D) β-tubulin staining shows disrupted microtubule morphology after incubation with 50 µM HL and co-application of Hp, expressed as concentration of free Hb remaining in media. Significance levels: \* =  $p < 0.05$ , \*\* =  $p < 0.01$ , \*\*\*\* =  $p < 0.0001$ .

854

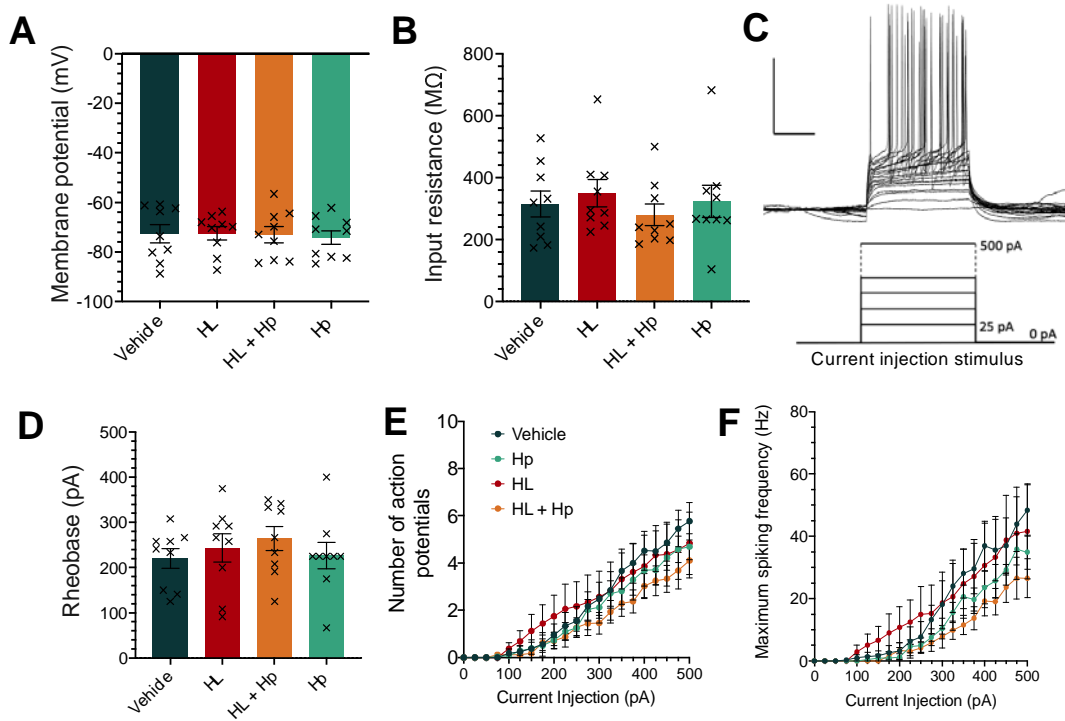

Figure 3. **Intrinsic neuronal membrane properties are not altered by 10  $\mu$ M Hb within one week.** A) Membrane potential and B) input resistance are measured upon break-in to the cell in whole-cell patch clamp. C) A current injection stimulus in steps of 25 pA is applied to the cell in bridge compensated current clamp. D) Rheobase measured from a 250 msec current injection in C. E) maximum number of action potentials fired and F) the maximum spiking frequency observed at each current injection step. N = 3-5 cells per culture, 9 cultures.

855

856

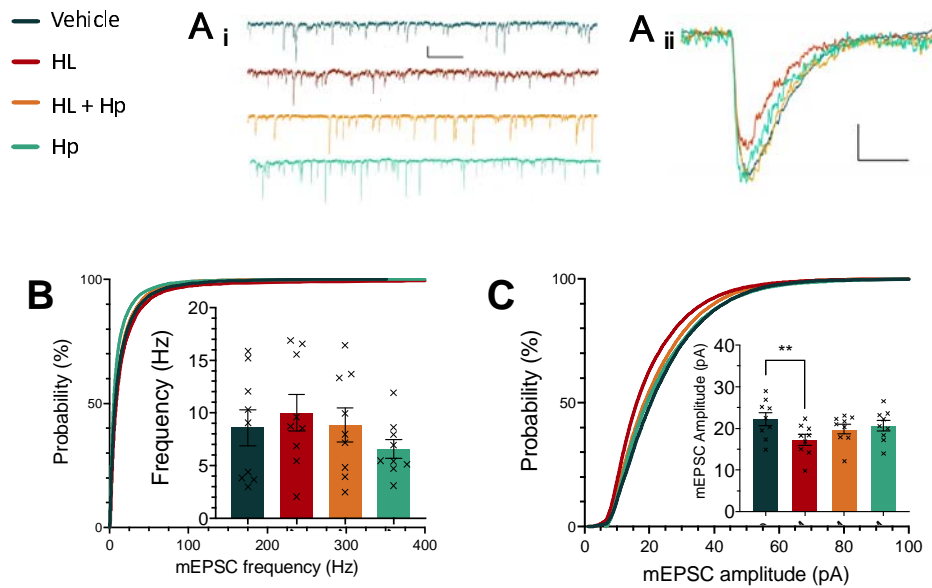

Figure 4. **Miniature excitatory postsynaptic current (mEPSC) amplitude is reduced by a 1-week exposure to 10 μM HL.** A) Sample traces showing i) mEPSCs (scale bar 1 sec/10 pA) and ii) overlaid individual events (scale bar 10 msec/ 10 pA). B) Quantification of mEPSC frequency and C) amplitude as cumulative frequency distribution and median value per culture. N = 3 cells per culture, 9 cultures. Significance levels: \*\* p < 0.01

857

858

859

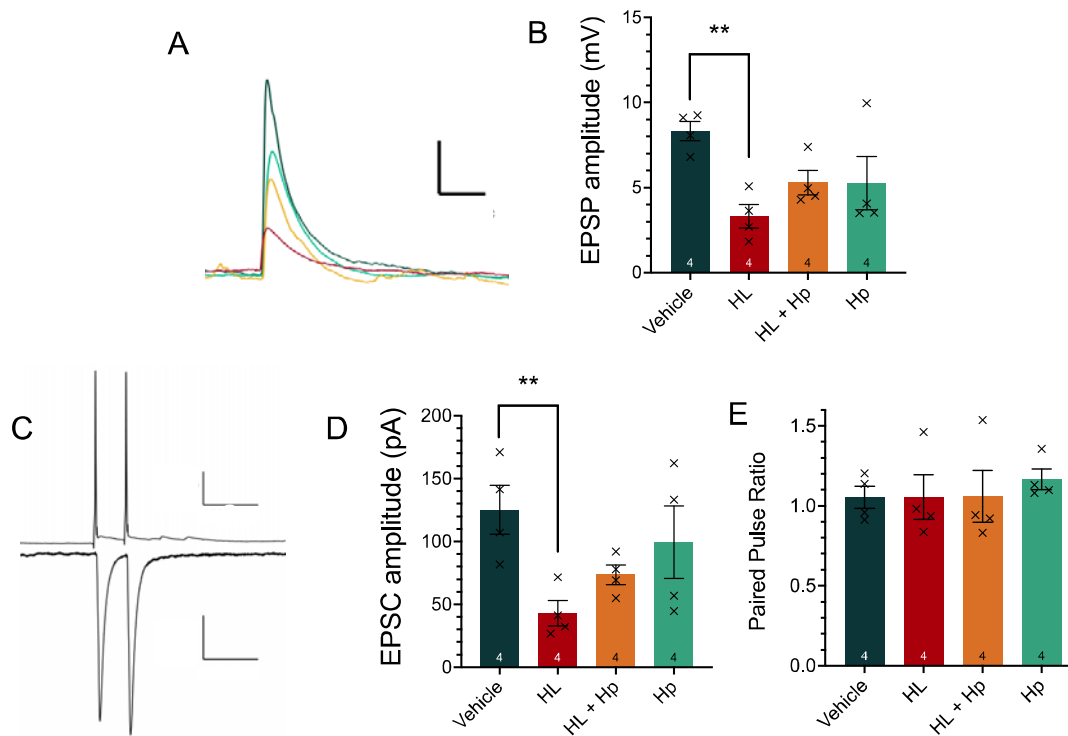

Figure 5. **Amplitude of evoked excitatory post synaptic potentials (EPSPs) and excitatory postsynaptic currents (EPSCs) is reduced by 10  $\mu$ M HL.** A) Representative mean EPSPs (scale bar 50 sec/ 2 mV). B) Quantification of evoked EPSP amplitude. C) Paired-pulse sample trace with inter-pulse interval of 50 msec (scale bar top: 100 msec/ 25 mV, bottom: 100 msec/ 25 pA). D) Unitary EPSC amplitude and E) Paired pulse ratio. N = 3 pairs per culture, 4 cultures. Significance levels: \*\* p<0.01.

860

861

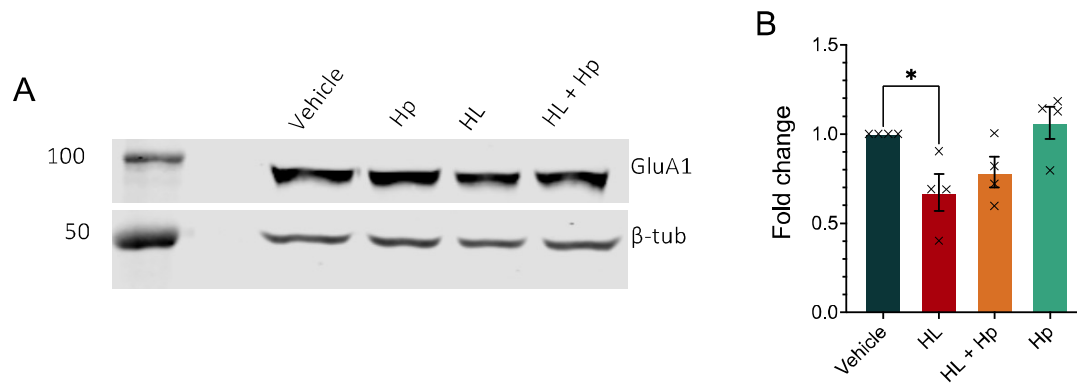

**Figure 6. Total AMPA receptor GluR1 subunit levels are reduced in hippocampal cell cultures by a one week incubation with HL.** A) Hippocampal cell culture lysates were prepared at DIV21 after a one week incubation with 10  $\mu$ M HL or Hp and blots probed for GluR1 and  $\beta$ -tubulin. B) Quantification of GluA1 normalised to loading control. N = 3 cultures. Significance level: \*  $p < 0.05$
